# Supplementary material for: Theoretical insights into Pd-catalyzed dual γ-1,1-C(sp 3 )–H activation of aliphatic carboxylic acids: mechanistic pathways, substituent influence on product selectivity, diastereoselectivity, and additive effects
Source: Royal Society of Chemistry journal article supplement (doi:10.1039/d4qo01451k), 2024-01-01
Supplement: d4qo01451k2.pdf [file d4qo01451k2.pdf]

## *Supporting Information*

### **Theoretical Insights into Pd-Catalyzed Dual $\gamma$ -1,1-C(sp<sup>3</sup>)-H Activation of Aliphatic Carboxylic Acids: Mechanistic Pathways, Substituent Influence on Product Selectivity, Diastereoselectivity, and Additive Effects**

Jiaoyang Liu, Lijuan Huang, Zeang Sun and Juan Li\*

College of Chemistry and Materials Science, Guangdong Provincial Key Laboratory of Functional Supramolecular Coordination Materials and Applications, Jinan University, Guangzhou, Guangdong 510632, P. R. China

\*Corresponding author. Email: tchjli@jnu.edu.cn

---

#### **Table of Contents**

---

|                  |                                                                   |     |
|------------------|-------------------------------------------------------------------|-----|
| <b>Section 1</b> | Other Possible Isomers (Schemes S1-S11)                           | S2  |
| <b>Section 2</b> | Optimization with BP86 and M06 Methods (Table S1)                 | S6  |
| <b>Section 3</b> | Relaxed Potential Energy Surface Scan (Figs. S1-S2)               | S7  |
| <b>Section 4</b> | Complete Free-Energy Profiles for the Formation of 3b (Fig. S3)   | S8  |
| <b>Section 5</b> | Complete Free-Energy Profiles for the Formation of 3c. (Fig. S4)  | S9  |
| <b>Section 6</b> | Other possible pathways (Figs. S5–S13)                            | S10 |
| <b>Section 7</b> | Energies (in Hartree) of All TSs and Intermediates                | S16 |
| <b>Section 8</b> | Calculated Imaginary Frequencies of All Transition States Species | S21 |

---

## Section 1. Other Possible Isomers

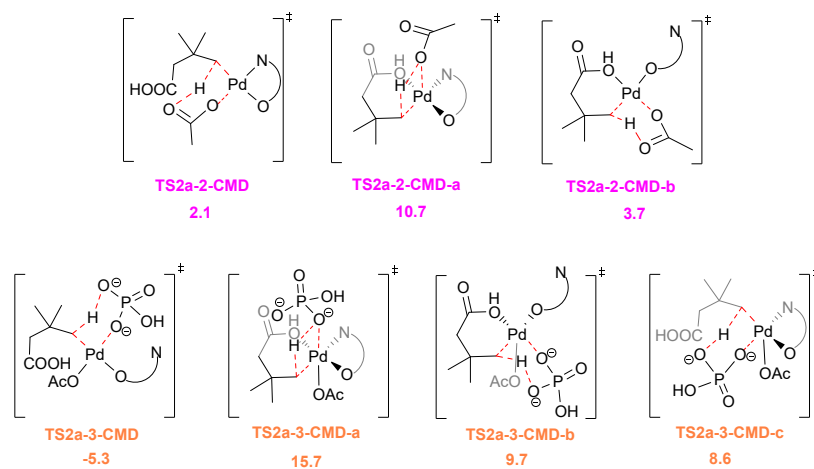

**Scheme S1** Other possible isomers of transition states **TS2a-2-CMD** and **TS2a-3-CMD** with relative free energies in kcal/mol.

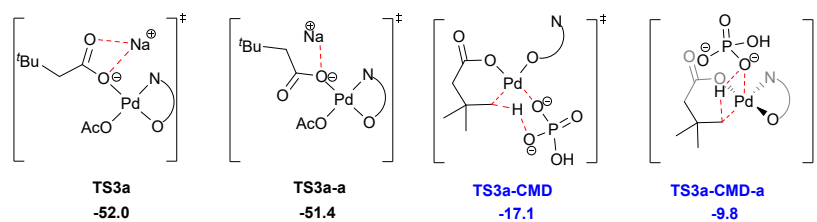

**Scheme S2** Other possible isomers of transition states **TS3a** and **TS3a-CMD** with relative free energies in kcal/mol.

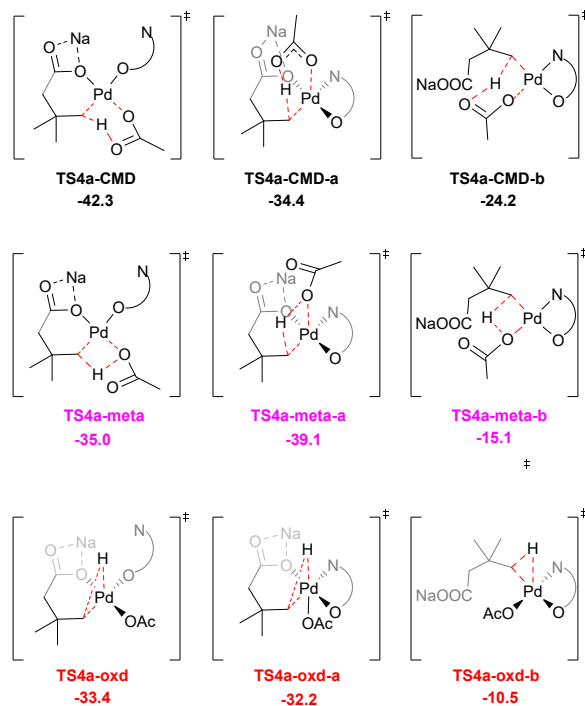

**Scheme S3** Other possible isomers of transition states **TS4a** with relative free energies in kcal/mol.

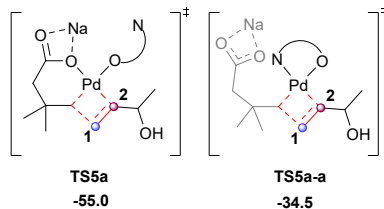

**Scheme S4** Other possible isomers of transition state **TS5a** with relative free energies in kcal/mol.

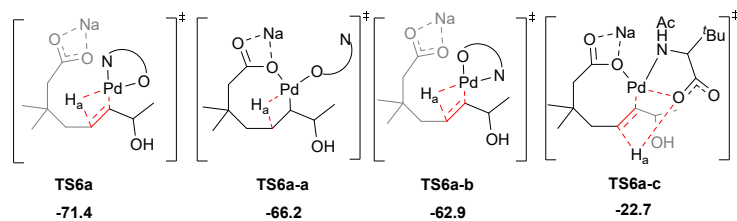

**Scheme S5** Other possible isomers of transition states **TS6a** with relative free energies in kcal/mol.

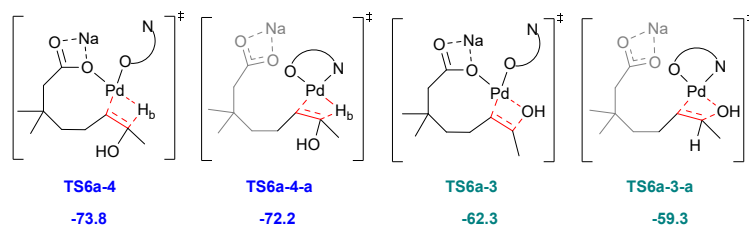

**Scheme S6** Other possible isomers of transition states **TS6a-3** and **TS6a-4** with relative free energies in kcal/mol.

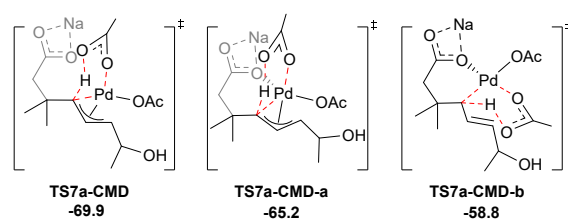

**Scheme S7** Other possible isomers of transition states **TS7a-CMD** with relative free energies in kcal/mol.

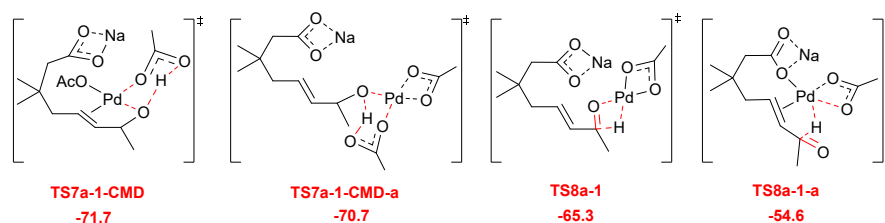

**Scheme S8** Other possible isomers of transition states **TS7a-1-CMD** and **TS8a-3** with relative free energies in kcal/mol.

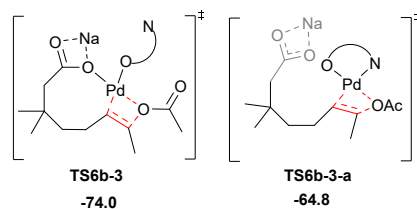

**Scheme S9** Other possible isomers of transition states **TS6b-3** with relative free energies in kcal/mol.

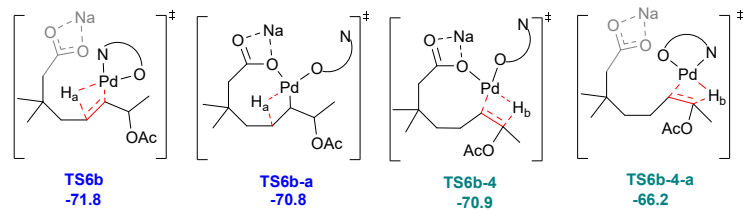

**Scheme S10** Other possible isomers of transition states **TS6b** and **TS6b-4** with relative free energies in kcal/mol.

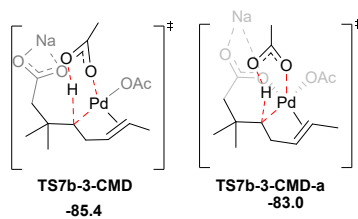

**Scheme S11** Other possible isomers of transition states **TS7b-3-CMD** with relative free energies in kcal/mol.

## Section 2. Optimization with BP86 and M06 Methods

**Table S1.** Relative Gibbs energies (in kcal/mol) for key transition states using BP86 and M06 methods.

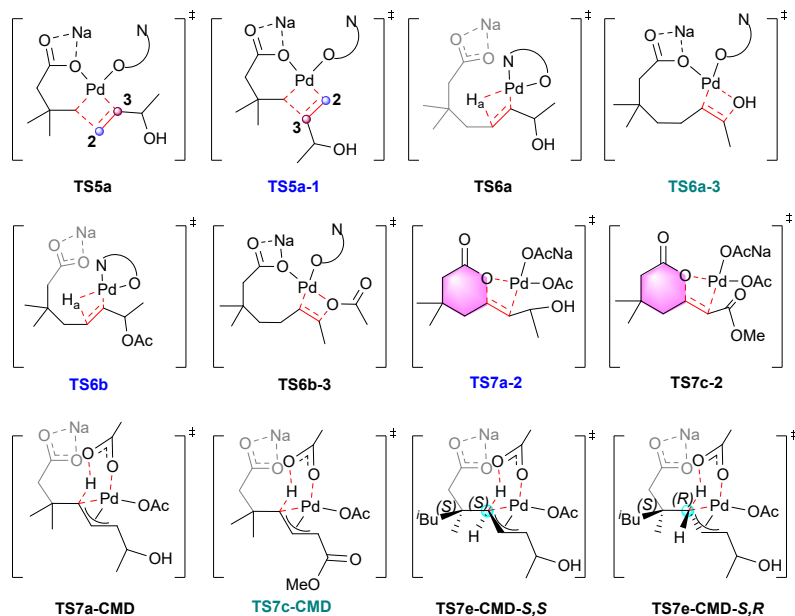

| Species            | $\Delta\Delta G(\text{B3LYP})$ | $\Delta\Delta G(\text{BP86})$ | $\Delta\Delta G(\text{M06})$ |
|--------------------|--------------------------------|-------------------------------|------------------------------|
| <b>TS5a</b>        | 0.0                            | 0.0                           | 0.0                          |
| <b>TS5a-1</b>      | 4.8                            | 3.8                           | 5.7                          |
| <b>TS6a</b>        | 0.0                            | 0.0                           | 0.0                          |
| <b>TS6a-3</b>      | 9.1                            | 7.2                           | 8.4                          |
| <b>TS6b-3</b>      | 0.0                            | 0.0                           | 0.0                          |
| <b>TS6b</b>        | 2.6                            | 3.6                           | 2.0                          |
| <b>TS7a-CMD</b>    | 0.0                            | 0.0                           | 0.0                          |
| <b>TS7a-2</b>      | 5.4                            | 5.8                           | 4.0                          |
| <b>TS7c-2</b>      | 0.0                            | 0.0                           | 0.0                          |
| <b>TS7c-CMD</b>    | 2.1                            | 2.9                           | 3.7                          |
| <b>TS7e-CMD-SR</b> | 0.0                            | 0.0                           | 0.0                          |
| <b>TS7e-CMD-SS</b> | 3.6                            | 2.7                           | 3.4                          |

### Section 3. Relaxed Potential Energy Surface Scan

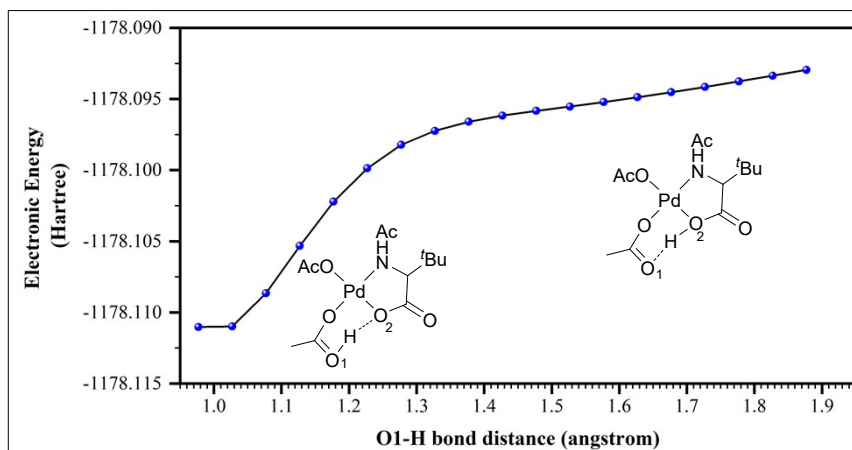

**Fig. S1** Relaxed potential energy surface scan of the **O1-H** distance for the CMD transition state from **IN2a** to **IN1a** along the IRC curve.

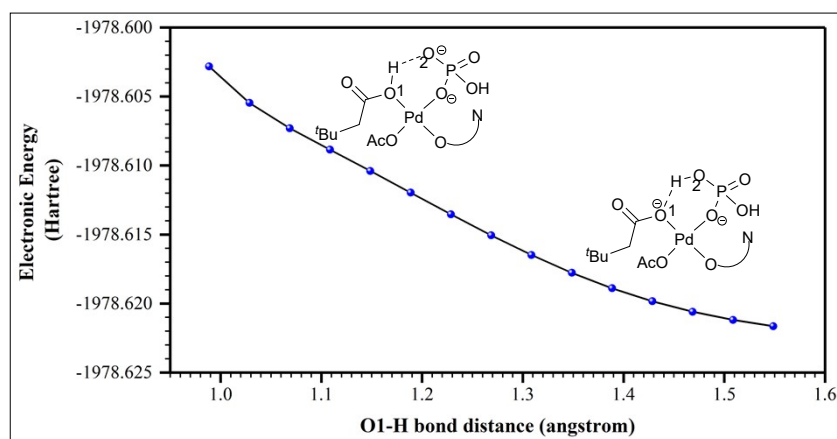

**Fig. S2** Relaxed potential energy surface scan of the **O1-H** distance for the CMD transition state from **IN4a** to **IN5a** along the IRC curve.

## Section 4. Complete Free-Energy Profiles for the Formation of 3b

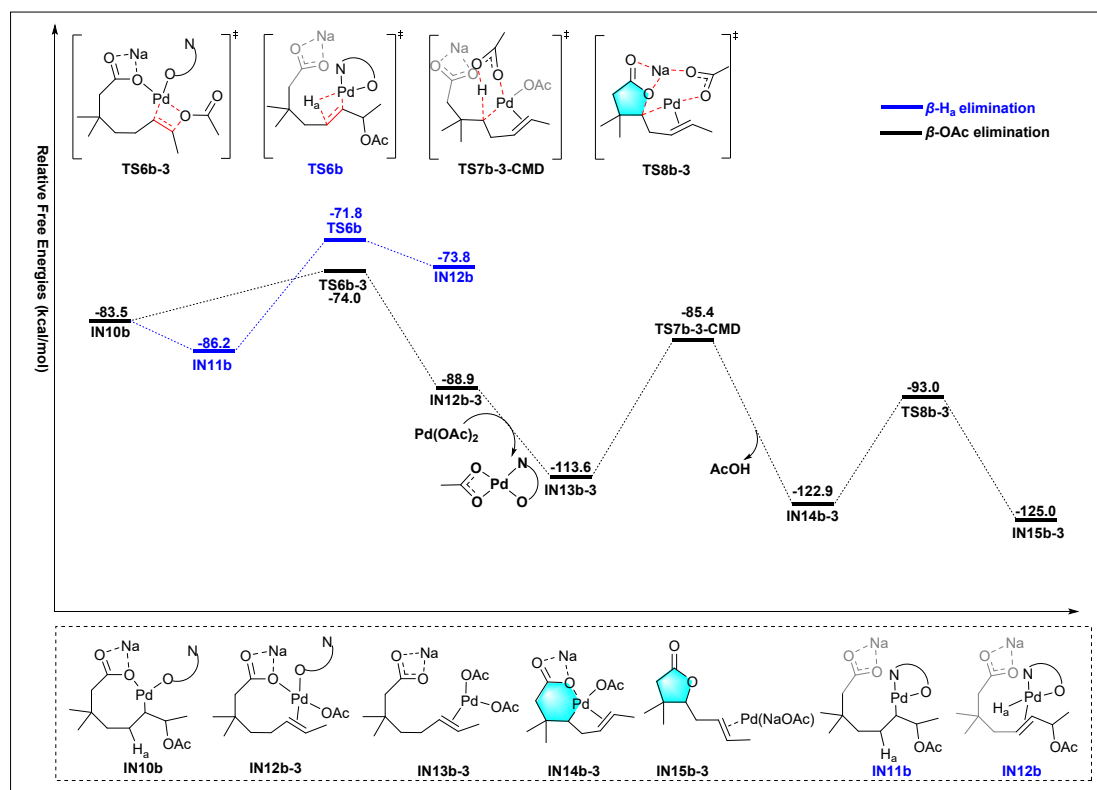

**Fig. S3** Calculated free-energy profiles for the process from **IN10b** to **IN15b-3** with relative free energies in kcal/mol. The  $\beta$ -H<sub>a</sub> elimination mechanism is shown in blue.



## Section 5. Complete Free-Energy Profiles for the Formation of 3c

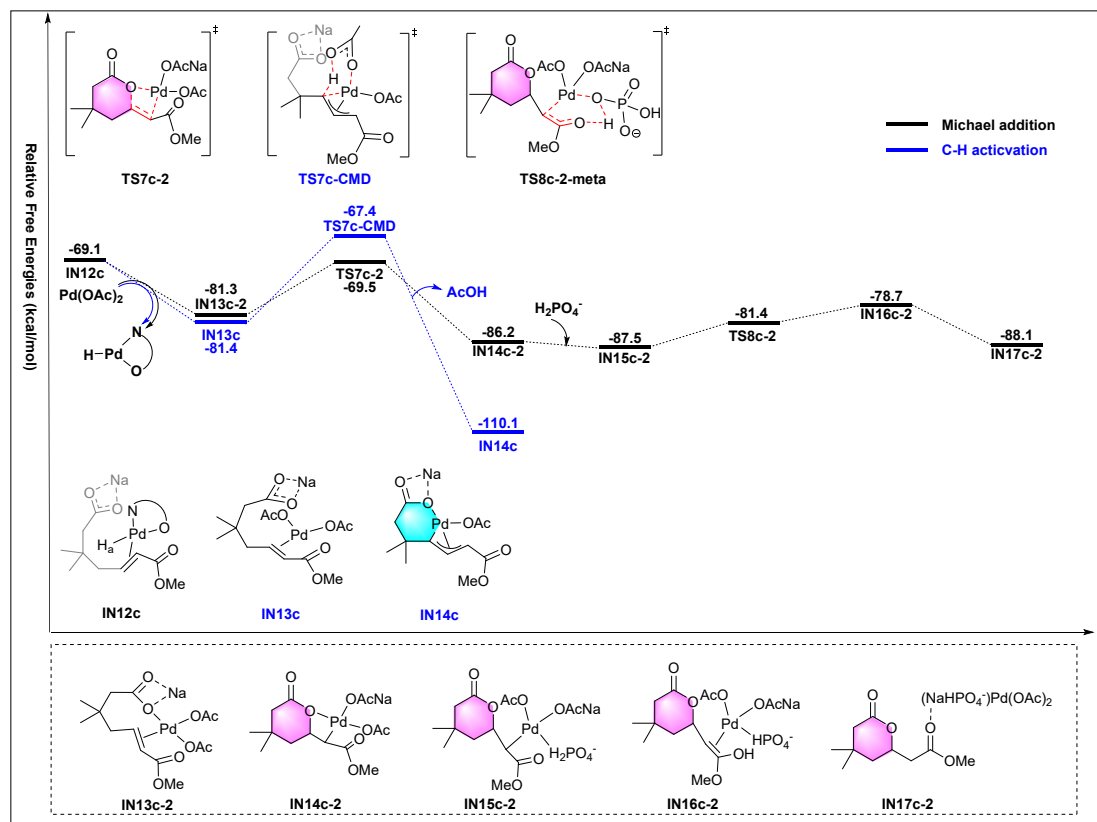

**Fig. S4** Calculated free-energy profiles for the process from **IN12c** to **IN17c-2** with relative free energies in kcal/mol. The C–H activation mechanism is shown in blue.

## Section 6. Other Possible Pathways

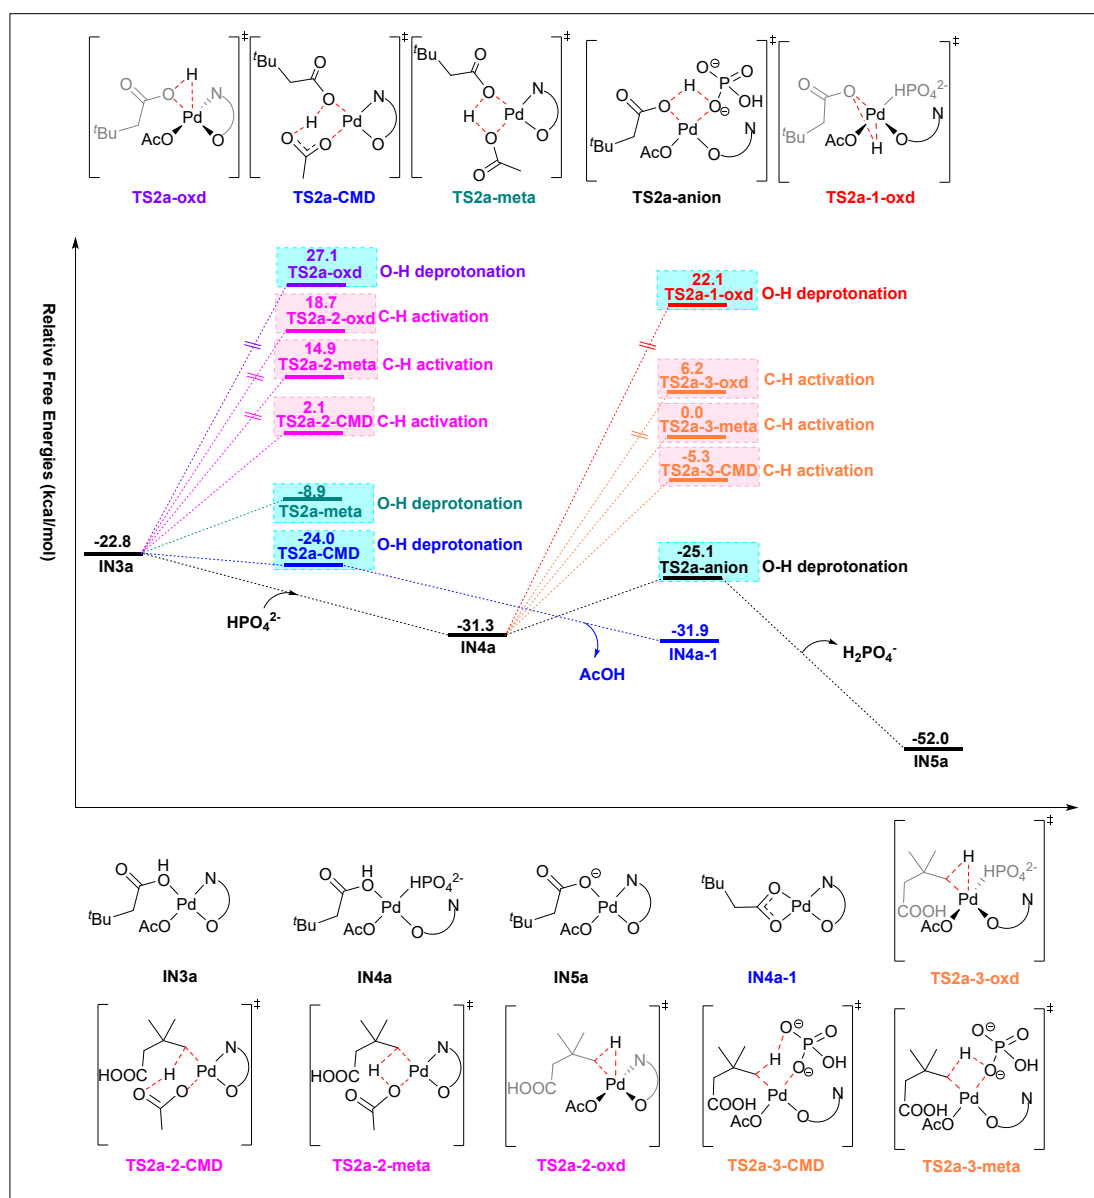

**Fig. S5** Calculated free-energy profiles comparing C–H activation and O–H deprotonation from **IN3a**. Relative free energies are provided in kcal/mol.

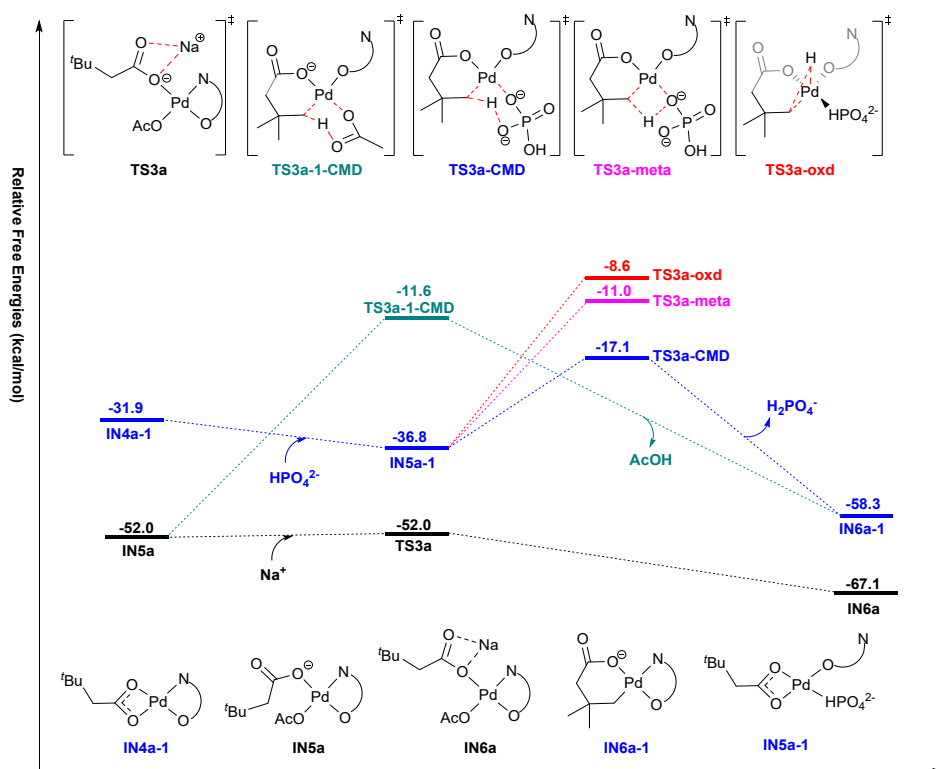

**Fig. S6** Calculated free-energy profiles for alternative pathways from IN5a. Relative free energies are provided in kcal/mol.

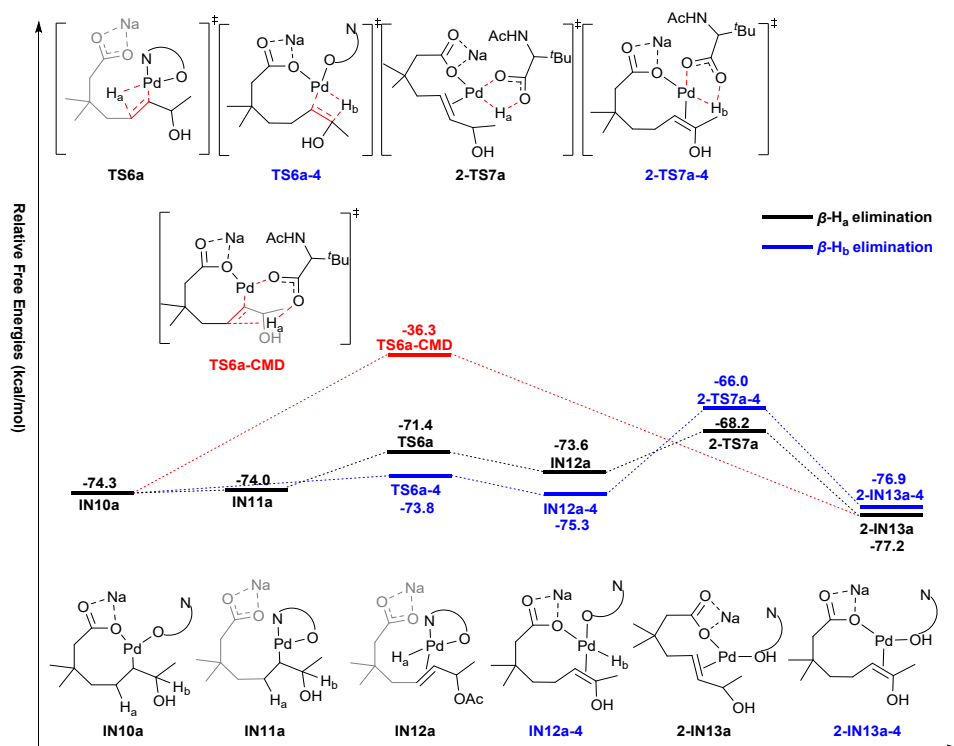

**Fig. S7** Calculated free-energy profiles for the reductive elimination pathways from IN10a to 2-IN13a. Relative free energies are provided in kcal/mol.

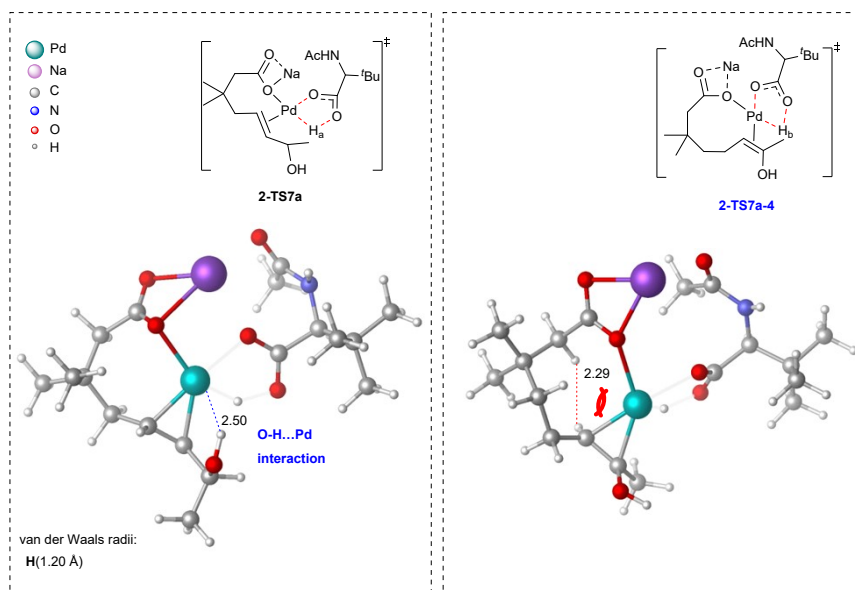

**Fig. S8** Optimized structures of transition states **2-TS7a**, **2-TS7a-4** with distances in Å.

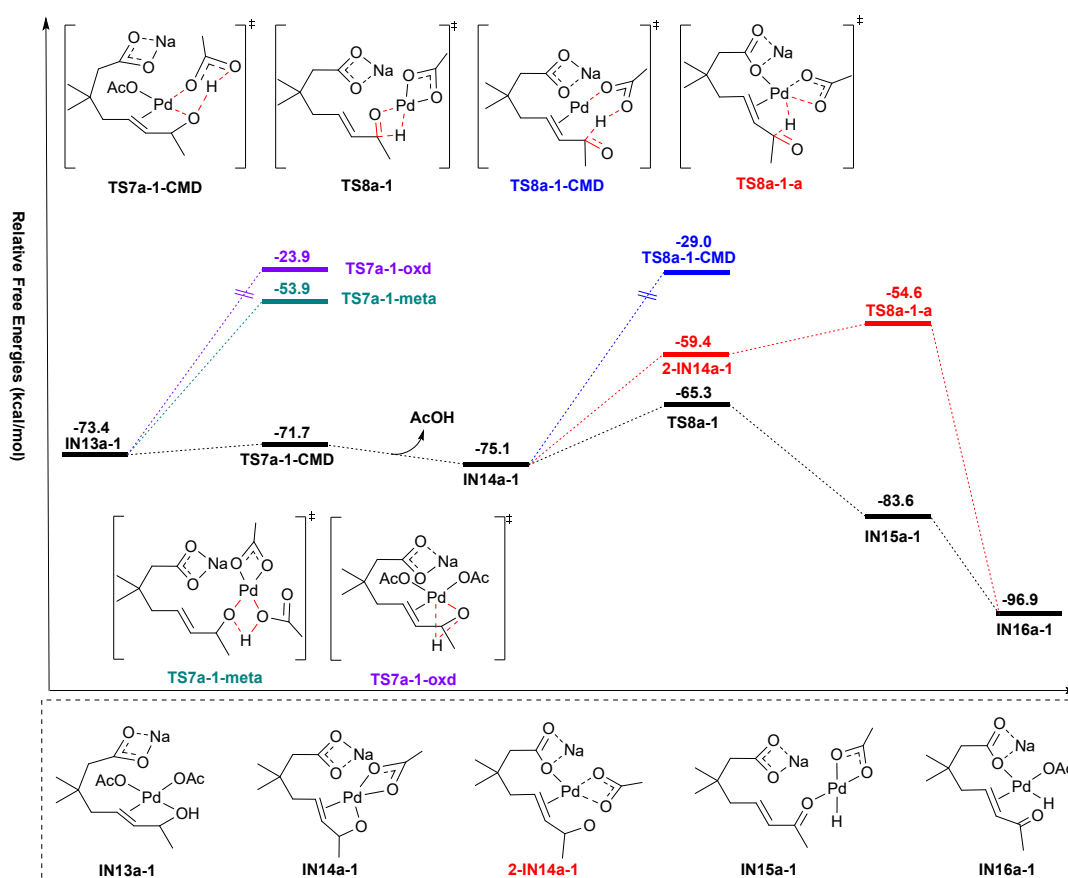

**Fig. S9** Calculated free-energy profiles for the process from **IN13a-1**. Relative free energies are provided in kcal/mol.

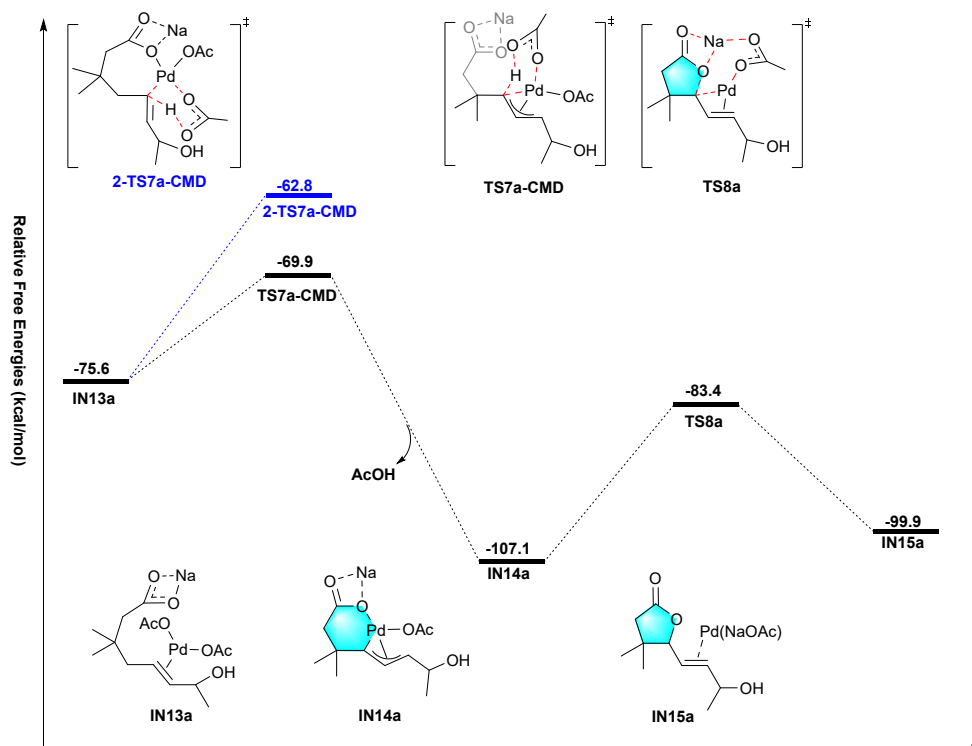

**Fig. S10** Calculated free-energy profiles for the process from **IN13a**. Relative free energies are provided in kcal/mol.

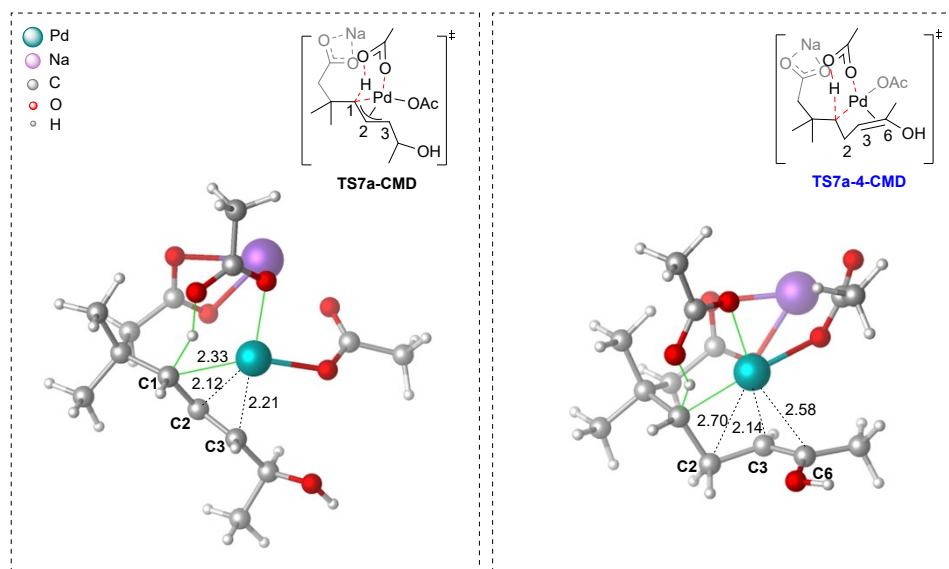

**Fig. S11** Optimized structures of transition states **TS7a-CMD**, **TS7a-4-CMD** with distances in Å.

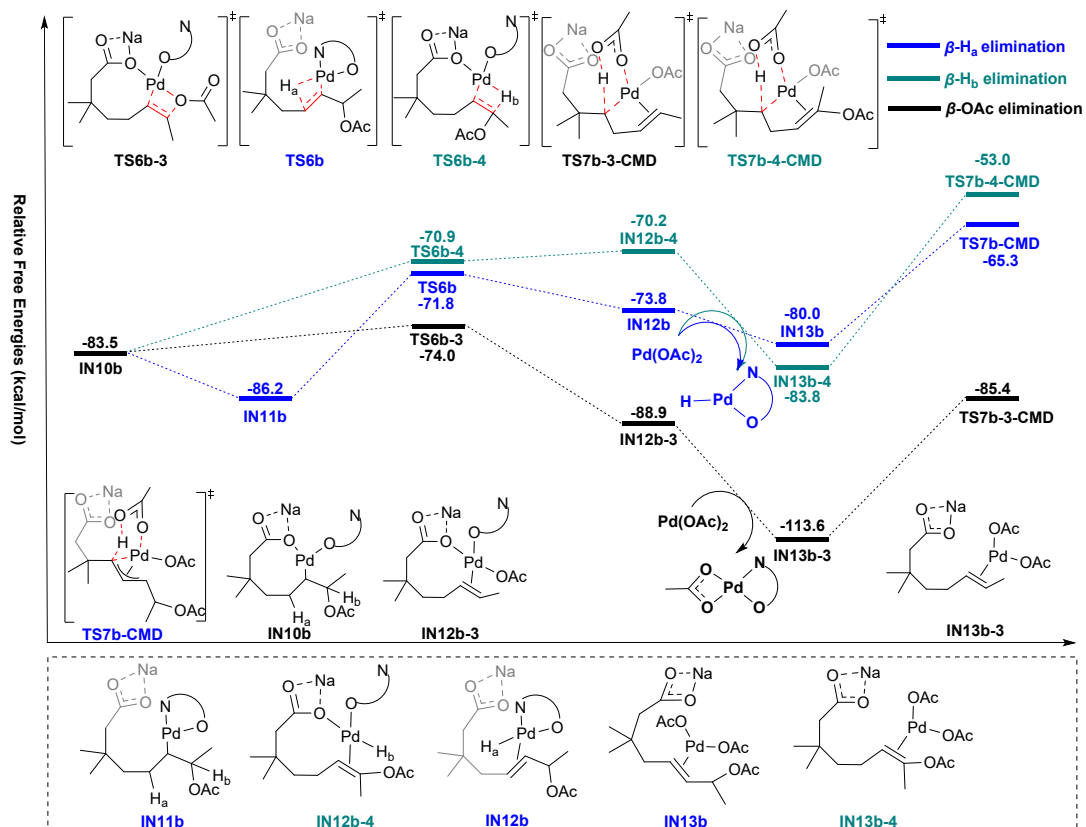

**Fig. S12** Calculated free-energy profiles for the three pathways:  $\beta$ -H<sub>a</sub> elimination (blue),  $\beta$ -H<sub>b</sub> elimination (green), and  $\beta$ -OAc elimination (black). Relative free energies are provided in kcal/ mol.

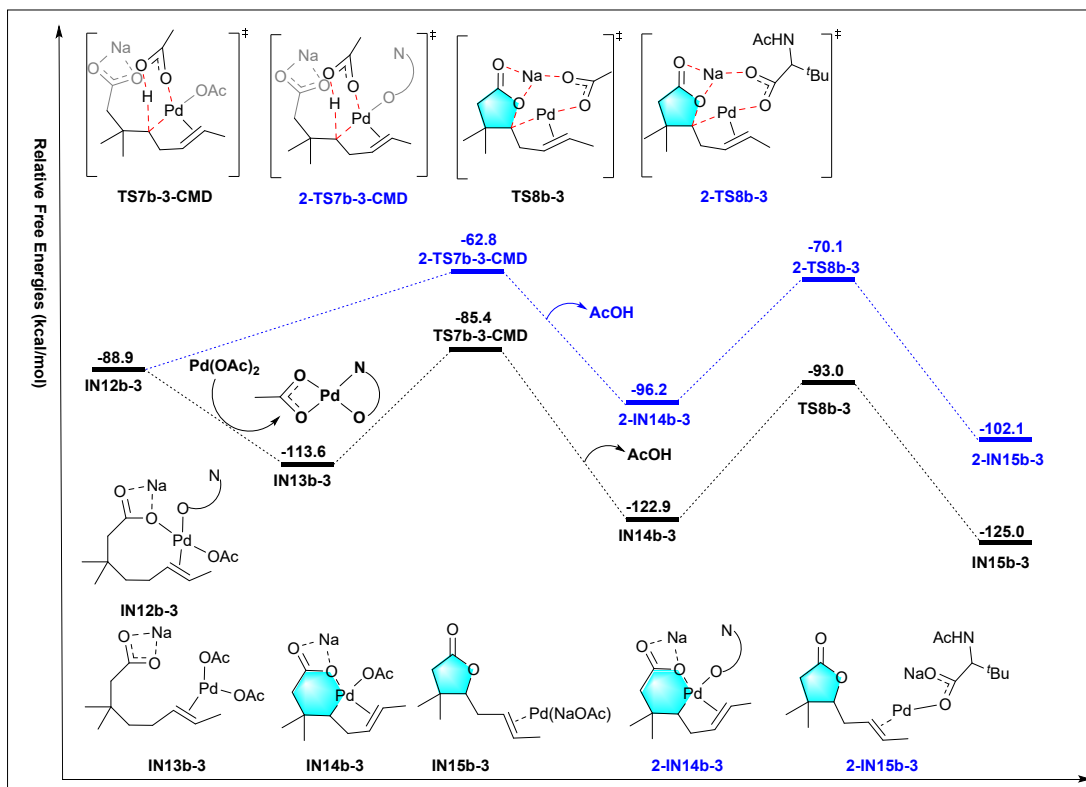

**Fig. S13** Calculated free-energy profiles comparing C(sp<sup>2</sup>)-H and C(sp<sup>3</sup>)-H activation from IN12b-3. Relative free energies are provided in kcal/mol.

## Section 7. Energies (in Hartree) of all TSs and Intermediates

| Geometry                                       | $E_0$        | $E$          | $H_{383.15}$ | $G_{383.15}$ | $E_{(\text{sol},\text{B3LYP})}$ |
|------------------------------------------------|--------------|--------------|--------------|--------------|---------------------------------|
| <b>Pd(OAc)<sub>2</sub></b>                     | -583.604642  | -583.588659  | -583.587445  | -583.657611  | -584.7435698                    |
| <b>L1</b>                                      | -594.144466  | -594.123141  | -594.121928  | -594.201070  | -594.1698134                    |
| <b>IN1a</b>                                    | -1177.807194 | -1177.767879 | -1177.766665 | -1177.891107 | -1178.965916                    |
| <b>TS1a-meta</b>                               | -1177.777982 | -1177.739224 | -1177.738011 | -1177.860419 | -1178.927695                    |
| <b>TS1a-oxd</b>                                | -1177.736224 | -1177.697623 | -1177.696410 | -1177.817507 | -1178.881564                    |
| <b>AcOH</b>                                    | -229.026944  | -229.020243  | -229.019030  | -229.063679  | -229.0402594                    |
| <b>IN2a</b>                                    | -948.753331  | -948.722795  | -948.721581  | -948.823591  | -949.901888                     |
| <b>1a</b>                                      | -386.177530  | -386.162922  | -386.161708  | -386.224977  | -386.2076449                    |
| <b>IN3a</b>                                    | -1334.979013 | -1334.932451 | -1334.931238 | -1335.069530 | -1336.148016                    |
| <b>HPO<sub>4</sub><sup>2-</sup></b>            | -643.169845  | -643.162079  | -643.160866  | -643.209603  | -643.218899                     |
| <b>IN4a</b>                                    | -1978.215727 | -1978.160441 | -1978.159228 | -1978.314652 | -1979.416418                    |
| <b>TS2a-CMD</b>                                | -1334.982370 | -1334.936570 | -1334.935357 | -1335.072089 | -1336.149363                    |
| <b>TS2a-meta</b>                               | -1334.953111 | -1334.906759 | -1334.905546 | -1335.044460 | -1336.121082                    |
| <b>TS2a-oxd</b>                                | -1334.902578 | -1334.855767 | -1334.854554 | -1334.993120 | -1336.063757                    |
| <b>TS2a-2-CMD</b>                              | -1334.923863 | -1334.878084 | -1334.876871 | -1335.011916 | -1336.108656                    |
| <b>TS2a-2-meta</b>                             | -1334.903895 | -1334.857674 | -1334.856460 | -1334.991664 | -1336.087322                    |
| <b>TS2a-2-oxd</b>                              | -1334.900238 | -1334.854176 | -1334.852962 | -1334.987607 | -1336.083684                    |
| <b>TS2a-2-CMD-a</b>                            | -1334.912027 | -1334.865398 | -1334.864184 | -1335.001894 | -1336.090733                    |
| <b>TS2a-2-CMD-b</b>                            | -1334.922352 | -1334.876091 | -1334.874877 | -1335.014653 | -1336.100016                    |
| <b>IN4a-1</b>                                  | -1105.933069 | -1105.894758 | -1105.893544 | -1106.012469 | -1497.880219                    |
| <b>TS2a-anion</b>                              | -1978.202033 | -1978.146159 | -1978.144945 | -1978.305394 | -1979.397005                    |
| <b>TS2a-1-oxd</b>                              | -1978.133329 | -1978.077819 | -1978.076605 | -1978.231900 | -1979.32576                     |
| <b>TS2a-3-CMD</b>                              | -1978.161575 | -1978.106211 | -1978.104997 | -1978.260532 | -1979.368794                    |
| <b>TS2a-3-meta</b>                             | -1978.141934 | -1978.086134 | -1978.084920 | -1978.244545 | -1979.356645                    |
| <b>TS2a-3-oxd</b>                              | -1978.135394 | -1978.080827 | -1978.079614 | -1978.234223 | -1979.35631                     |
| <b>TS2a-3-CMD-a</b>                            | -1978.118815 | -1978.063078 | -1978.061865 | -1978.218672 | -1979.334931                    |
| <b>TS2a-3-CMD-b</b>                            | -1978.134095 | -1978.078592 | -1978.077379 | -1978.234345 | -1979.342608                    |
| <b>TS2a-3-CMD-c</b>                            | -1978.136513 | -1978.081589 | -1978.080375 | -1978.232889 | -1979.350676                    |
| <b>H<sub>2</sub>PO<sub>4</sub><sup>-</sup></b> | -643.657399  | -643.648987  | -643.647774  | -643.696685  | -643.6994192                    |
| <b>IN5a</b>                                    | -1334.545898 | -1334.499409 | -1334.498196 | -1334.636644 | -1335.715016                    |
| <b>IN5a-1</b>                                  | -1749.155929 | -1749.107996 | -1749.106782 | -1749.250264 | -1750.349983                    |
| <b>Na<sup>+</sup></b>                          | -162.190819  | -162.188999  | -162.187786  | -162.210122  | -162.1850646                    |
| <b>TS3a</b>                                    | -1496.771344 | -1496.723206 | -1496.721993 | -1496.861965 | -1497.92083                     |
| <b>TS3a-HFIP</b>                               | -2286.520669 | -2286.456296 | -2286.455083 | -2286.634456 | -2287.6854831                   |
| <b>TS3a-a</b>                                  | -1496.766788 | -1496.718627 | -1496.717413 | -1496.859479 | -1497.917617                    |
| <b>TS3a-CMD</b>                                | -1749.116817 | -1749.069790 | -1749.068577 | -1749.207920 | -1750.315774                    |
| <b>TS3a-CMD-a</b>                              | -1749.110739 | -1749.065294 | -1749.064080 | -1749.195361 | -1750.3107413                   |
| <b>TS3a-meta</b>                               | -1749.101290 | -1749.053734 | -1749.052521 | -1749.192443 | -1750.305384                    |
| <b>TS3a-oxd</b>                                | -1749.105144 | -1749.058805 | -1749.057591 | -1749.192933 | -1750.306989                    |
| <b>TS3a-1-CMD</b>                              | -1334.484565 | -1334.438426 | -1334.437212 | -1334.575134 | -1335.663383                    |



|                     |              |              |              |              |               |
|---------------------|--------------|--------------|--------------|--------------|---------------|
| <b>TS3a-1-CMD-a</b> | -1749.110739 | -1749.065294 | -1749.064080 | -1749.195361 | -1750.310741  |
| <b>IN6a</b>         | -1496.799368 | -1496.750475 | -1496.749261 | -1496.892302 | -1497.942992  |
| <b>IN6a-1</b>       | -1105.483429 | -1105.445492 | -1105.444279 | -1105.562612 | -1106.657267  |
| <b>IN7a</b>         | -1496.776470 | -1496.727312 | -1496.726099 | -1496.869947 | -1497.916011  |
| <b>TS4a-CMD</b>     | -1496.754654 | -1496.706381 | -1496.705168 | -1496.848573 | -1497.897005  |
| <b>TS4a-CMD-a</b>   | -1496.741564 | -1496.693418 | -1496.692204 | -1496.832177 | -1497.887376  |
| <b>TS4a-CMD-b</b>   | -1496.712443 | -1496.664559 | -1496.663345 | -1496.804005 | -1497.871704  |
| <b>TS4a-meta</b>    | -1496.737167 | -1496.688416 | -1496.687203 | -1496.832880 | -1497.881885  |
| <b>TS4a-meta-a</b>  | -1496.751169 | -1496.703136 | -1496.701923 | -1496.840829 | -1497.895851  |
| <b>TS4a-meta-b</b>  | -1496.668036 | -1496.620085 | -1496.618872 | -1496.758389 | -1497.858093  |
| <b>TS4a-oxd</b>     | -1496.744670 | -1496.696158 | -1496.694945 | -1496.836416 | -1497.885609  |
| <b>TS4a-oxd-a</b>   | -1496.738663 | -1496.689959 | -1496.688746 | -1496.830814 | -1497.882946  |
| <b>TS4a-oxd-b</b>   | -1496.692564 | -1496.644284 | -1496.643070 | -1496.785136 | -1497.849403  |
| <b>IN8a</b>         | -1267.723122 | -1267.682095 | -1267.680881 | -1267.807268 | -1268.862223  |
| <b>2a</b>           | -232.322917  | -232.313364  | -232.312150  | -232.362975  | -232.3431789  |
| <b>IN9a</b>         | -1500.092521 | -1500.040634 | -1500.039421 | -1500.189659 | -1501.259404  |
| <b>IN9a-1</b>       | -1500.096005 | -1500.044633 | -1500.043420 | -1500.190366 | -1501.262439  |
| <b>TS5a</b>         | -1500.059944 | -1500.009976 | -1500.008763 | -1500.153355 | -1501.230923  |
| <b>TS5a-BP86</b>    | -1500.135651 | -1500.084626 | -1500.083412 | -1500.229127 | -1501.224918  |
| <b>TS5a-M06</b>     | -1499.218492 | -1499.168741 | -1499.167528 | -1499.309699 | -1501.235134  |
| <b>TS5a-1</b>       | -1500.049238 | -1499.998735 | -1499.997521 | -1500.143159 | -1501.221196  |
| <b>TS5a-1-BP86</b>  | -1500.124615 | -1500.072739 | -1500.071526 | -1500.219874 | -1501.215192  |
| <b>TS5a-1-M06</b>   | -1499.207871 | -1499.157743 | -1499.156530 | -1499.299826 | -1501.224107  |
| <b>TS5a-a</b>       | -1500.020538 | -1499.971179 | -1499.969965 | -1500.111790 | -1501.199825  |
| <b>IN10a</b>        | -1500.093959 | -1500.043758 | -1500.042544 | -1500.185263 | -1501.2648044 |
| <b>IN10a-1</b>      | -1500.073214 | -1500.022452 | -1500.021239 | -1500.167518 | -1501.242664  |
| <b>IN11a</b>        | -1500.089350 | -1500.038429 | -1500.037216 | -1500.182456 | -1501.261116  |
| <b>TS6a</b>         | -1500.081403 | -1500.030636 | -1500.029423 | -1500.174659 | -1501.251764  |
| <b>TS6a-BP86</b>    | -1500.158379 | -1500.106780 | -1500.105566 | -1500.251298 | -1501.246331  |
| <b>TS6a-M06</b>     | -1499.241820 | -1499.191194 | -1499.189981 | -1499.333416 | -1501.255634  |
| <b>TS6a-a</b>       | -1500.068940 | -1500.017809 | -1500.016596 | -1500.163885 | -1501.242334  |
| <b>TS6a-b</b>       | -1500.059923 | -1500.010071 | -1500.008857 | -1500.151051 | -1501.243511  |
| <b>TS6a-c</b>       | -1499.998562 | -1499.948071 | -1499.946858 | -1500.092712 | -1501.175071  |
| <b>TS6a-3</b>       | -1500.086320 | -1500.036365 | -1500.035151 | -1500.176821 | -1501.245481  |
| <b>TS6a-3-BP86</b>  | -1500.156882 | -1500.105818 | -1500.104605 | -1500.249033 | -1501.239711  |
| <b>TS6a-3-M06</b>   | -1499.233005 | -1499.183125 | -1499.181912 | -1499.322208 | -1501.248546  |
| <b>TS6a-3-a</b>     | -1500.076954 | -1500.026555 | -1500.025341 | -1500.169855 | -1501.236985  |
| <b>TS6a-4</b>       | -1500.092789 | -1500.042832 | -1500.041618 | -1500.183172 | -1501.261033  |
| <b>TS6a-4-a</b>     | -1500.083739 | -1500.033488 | -1500.032274 | -1500.177382 | -1501.254406  |
| <b>TS6a-CMD</b>     | -1500.020280 | -1499.969422 | -1499.968209 | -1500.116914 | -1501.1917    |
| <b>IN12a</b>        | -1500.088558 | -1500.037447 | -1500.036233 | -1500.183596 | -1501.2569822 |
| <b>IN12a-3</b>      | -1500.094719 | -1500.043603 | -1500.042390 | -1500.186343 | -1501.253424  |
| <b>IN12a-4</b>      | -1500.097601 | -1500.046693 | -1500.045479 | -1500.190973 | -1501.261496  |

|                      |              |              |              |              |               |
|----------------------|--------------|--------------|--------------|--------------|---------------|
| <b>H-Pd-L1</b>       | -720.881873  | -720.858368  | -720.857155  | -720.942556  | -722.0480543  |
| <b>IN13a</b>         | -1362.809098 | -1362.764973 | -1362.763759 | -1362.897782 | -1363.952267  |
| <b>IN13a-1</b>       | -1362.814157 | -1362.771092 | -1362.769879 | -1362.901259 | -1363.953524  |
| <b>IN13a-2</b>       | -1362.829563 | -1362.786315 | -1362.785102 | -1362.916526 | -1363.957398  |
| <b>IN13a-4</b>       | -1362.841934 | -1362.799387 | -1362.798174 | -1362.927733 | -1363.981751  |
| <b>TS7a-CMD</b>      | -1362.800170 | -1362.757183 | -1362.755970 | -1362.885215 | -1363.942853  |
| <b>2-TS7a-CMD</b>    | -1362.635001 | -1362.601433 | -1362.600219 | -1362.708055 | -1363.9284989 |
| <b>TS7a-CMD-BP86</b> | -1362.886429 | -1362.842417 | -1362.841204 | -1362.972886 | -1363.937079  |
| <b>TS7a-CMD-M06</b>  | -1362.097022 | -1362.054254 | -1362.053041 | -1362.180907 | -1363.945656  |
| <b>TS7a-CMD-a</b>    | -1362.788411 | -1362.744968 | -1362.743755 | -1362.876172 | -1363.931841  |
| <b>TS7a-CMD-b</b>    | -1362.779328 | -1362.735652 | -1362.734439 | -1362.869687 | -1363.918965  |
| <b>TS7a-meta</b>     | -1362.784626 | -1362.741259 | -1362.740046 | -1362.872652 | -1363.928517  |
| <b>TS7a-oxd</b>      | -1362.776913 | -1362.732938 | -1362.731725 | -1362.866265 | -1363.92206   |
| <b>TS7a-1-CMD</b>    | -1362.817946 | -1362.775810 | -1362.774597 | -1362.902451 | -1363.94844   |
| <b>TS7a-1-CMD-a</b>  | -1362.819538 | -1362.777114 | -1362.775901 | -1362.907312 | -1363.943344  |
| <b>TS7a-1-meta</b>   | -1362.796487 | -1362.753766 | -1362.752553 | -1362.884424 | -1363.91573   |
| <b>TS7a-1-oxd</b>    | -1362.745437 | -1362.702599 | -1362.701386 | -1362.830293 | -1363.869988  |
| <b>TS7a-2</b>        | -1362.809344 | -1362.767331 | -1362.766118 | -1362.895102 | -1363.939463  |
| <b>TS7a-2-BP86</b>   | -1362.888847 | -1362.845840 | -1362.844627 | -1362.975864 | -1363.933     |
| <b>TS7a-2-M06</b>    | -1362.097733 | -1362.055495 | -1362.054281 | -1362.183606 | -1363.942483  |
| <b>TS7a-4-CMD</b>    | -1362.792243 | -1362.749542 | -1362.748329 | -1362.877060 | -1363.934198  |
| <b>2-TS7a</b>        | -1500.081510 | -1500.031187 | -1500.029973 | -1500.175091 | -1501.246455  |
| <b>2-TS7a-4</b>      | -1500.078781 | -1500.028390 | -1500.027176 | -1500.172344 | -1501.243736  |
| <b>2-IN13a</b>       | -1500.085663 | -1500.034682 | -1500.033468 | -1500.179628 | -1501.265361  |
| <b>2-IN13a-4</b>     | -1500.086803 | -1500.035846 | -1500.034632 | -1500.181513 | -1501.265153  |
| <b>2-IN14a-1</b>     | -1133.717183 | -1133.682336 | -1133.681123 | -1133.793468 | -1134.86047   |
| <b>IN14a</b>         | -1133.791442 | -1133.756891 | -1133.755677 | -1133.867609 | -1134.936661  |
| <b>IN14a-1</b>       | -1133.760179 | -1133.725659 | -1133.724446 | -1133.834723 | -1134.888395  |
| <b>IN14a-2</b>       | -1362.827602 | -1362.785071 | -1362.783857 | -1362.915873 | -1363.963428  |
| <b>IN14a-4</b>       | -1133.786114 | -1133.750769 | -1133.749555 | -1133.861426 | -1134.928124  |
| <b>TS8a</b>          | -1133.754972 | -1133.719883 | -1133.718670 | -1133.832691 | -1134.8967    |
| <b>TS8a-1</b>        | -1133.737940 | -1133.703062 | -1133.701848 | -1133.815078 | -1134.864154  |
| <b>TS8a-1-a</b>      | -1133.704489 | -1133.670118 | -1133.668905 | -1133.781178 | -1134.850015  |
| <b>TS8a-1-CMD</b>    | -1133.679437 | -1133.644798 | -1133.643585 | -1133.754717 | -1134.807671  |
| <b>IN15a</b>         | -1133.778509 | -1133.743085 | -1133.741871 | -1133.857556 | -1134.923327  |
| <b>IN15a-1</b>       | -1133.772243 | -1133.736161 | -1133.734948 | -1133.852678 | -1134.891919  |
| <b>IN16a-1</b>       | -1133.778560 | -1133.743067 | -1133.741853 | -1133.856199 | -1134.916352  |
| <b>IN16a</b>         | -1199.821583 | -1199.782100 | -1199.780887 | -1199.905131 | -1200.96697   |
| <b>Pd(NaOAc)</b>     | -517.550601  | -517.539172  | -517.537959  | -517.599163  | -518.6921551  |
| <b>TS9a-CMD</b>      | -1199.822347 | -1199.783522 | -1199.782309 | -1199.904292 | -1200.962791  |
| <b>TS9a-meta</b>     | -1199.791344 | -1199.752378 | -1199.751165 | -1199.873405 | -1200.924368  |
| <b>TS9a-oxd</b>      | -1199.733411 | -1199.693787 | -1199.692574 | -1199.817592 | -1200.869165  |
| <b>IN17a</b>         | -970.767416  | -970.736442  | -970.735228  | -970.839511  | -971.90487    |

|                     |              |              |              |              |              |
|---------------------|--------------|--------------|--------------|--------------|--------------|
| <b>TS10a</b>        | -970.741759  | -970.710521  | -970.709308  | -970.815345  | -971.8776305 |
| <b>IN18a</b>        | -970.770007  | -970.737640  | -970.736426  | -970.844378  | -971.9020713 |
| <b>IN19a</b>        | -970.771368  | -970.738502  | -970.737289  | -970.848428  | -971.9125594 |
| <b>TS11a</b>        | -970.771601  | -970.739881  | -970.738668  | -970.846453  | -971.9124892 |
| <b>IN20a</b>        | -970.799327  | -970.767144  | -970.765931  | -970.873369  | -971.9517111 |
| <b>2b</b>           | -384.949486  | -384.935491  | -384.934278  | -384.996658  | -384.9520288 |
| <b>IN10b</b>        | -1652.745247 | -1652.690306 | -1652.689092 | -1652.842123 | -1653.890425 |
| <b>IN11b</b>        | -1652.744520 | -1652.689299 | -1652.688085 | -1652.843678 | -1653.891863 |
| <b>TS6b</b>         | -1652.711834 | -1652.656826 | -1652.655613 | -1652.809317 | -1653.865785 |
| <b>TS6b-BP86</b>    | -1652.792238 | -1652.730125 | -1652.735271 | -1652.888620 | -1653.85295  |
| <b>TS6b-M06</b>     | -1651.779751 | -1651.724773 | -1651.723560 | -1651.875916 | -1653.86305  |
| <b>TS6b-a</b>       | -1652.703610 | -1652.647747 | -1652.646534 | -1652.804942 | -1653.859037 |
| <b>TS6b-3</b>       | -1652.732405 | -1652.677462 | -1652.676248 | -1652.829758 | -1653.872389 |
| <b>TS6b-3-BP86</b>  | -1652.805428 | -1652.749298 | -1652.748084 | -1652.903135 | -1653.863918 |
| <b>TS6b-3-M06</b>   | -1651.787495 | -1651.732669 | -1651.731456 | -1651.883201 | -1653.874015 |
| <b>TS6b-3-a</b>     | -1652.712503 | -1652.657326 | -1652.656112 | -1652.811579 | -1653.855048 |
| <b>TS6b-4</b>       | -1652.709336 | -1652.654373 | -1652.653160 | -1652.807403 | -1653.863923 |
| <b>TS6b-4-a</b>     | -1652.698048 | -1652.642814 | -1652.641601 | -1652.798635 | -1653.853158 |
| <b>AcO-Pd-L1</b>    | -948.779817  | -948.749394  | -948.748181  | -948.850225  | -949.9260985 |
| <b>IN12b</b>        | -1652.719046 | -1652.663769 | -1652.662556 | -1652.817376 | -1653.870268 |
| <b>IN12b-3</b>      | -1652.750484 | -1652.694227 | -1652.693013 | -1652.850739 | -1653.893205 |
| <b>IN12b-4</b>      | -1652.711919 | -1652.656143 | -1652.654929 | -1652.814118 | -1653.860008 |
| <b>IN13b</b>        | -1515.442190 | -1515.393465 | -1515.392251 | -1515.537044 | -1516.568664 |
| <b>IN13b-3</b>      | -1287.613362 | -1287.571573 | -1287.570360 | -1287.698723 | -1288.747539 |
| <b>IN13b-4</b>      | -1515.456897 | -1515.408502 | -1515.407288 | -1515.550928 | -1516.576818 |
| <b>TS7b-CMD</b>     | -1515.421082 | -1515.373629 | -1515.372416 | -1515.512434 | -1516.545562 |
| <b>TS7b-3-CMD</b>   | -1287.562987 | -1287.521796 | -1287.520582 | -1287.645657 | -1288.699617 |
| <b>TS7b-3-CMD-a</b> | -1287.559500 | -1287.518528 | -1287.517315 | -1287.641654 | -1288.696379 |
| <b>TS7b-4-CMD</b>   | -1515.405399 | -1515.357536 | -1515.356323 | -1515.496423 | -1516.525097 |
| <b>IN14b-3</b>      | -1058.555707 | -1058.522318 | -1058.521105 | -1058.629063 | -1059.694661 |
| <b>TS8b-3</b>       | -1058.502449 | -1058.468560 | -1058.467347 | -1058.579607 | -1059.64049  |
| <b>IN15b-3</b>      | -1058.558611 | -1058.526205 | -1058.524991 | -1058.633586 | -1059.697672 |
| <b>2-TS7b-3-CMD</b> | -1652.701419 | -1652.645577 | -1652.644364 | -1652.800177 | -1653.847023 |
| <b>2-IN14b-3</b>    | -1423.689043 | -1423.640879 | -1423.639665 | -1423.778671 | -1424.835052 |
| <b>2-TS8b-3</b>     | -1423.644081 | -1423.595662 | -1423.594449 | -1423.736243 | -1424.788711 |
| <b>2-IN15b-3</b>    | -1423.696653 | -1423.648514 | -1423.647300 | -1423.788602 | -1424.843546 |
| <b>2c</b>           | -306.374484  | -306.364603  | -306.363390  | -306.416080  | -306.3665519 |
| <b>IN12c</b>        | -1574.134018 | -1574.082695 | -1574.081481 | -1574.229247 | -1575.274324 |
| <b>IN13c</b>        | -1436.874767 | -1436.830356 | -1436.829143 | -1436.964736 | -1437.985743 |
| <b>IN13c-2</b>      | -1436.881070 | -1436.836977 | -1436.835763 | -1436.970430 | -1437.986755 |
| <b>TS7c-2</b>       | -1436.864916 | -1436.822115 | -1436.820902 | -1436.951056 | -1437.971026 |
| <b>TS7c-2-BP86</b>  | -1436.949411 | -1436.905441 | -1436.904228 | -1437.038353 | -1437.963526 |
| <b>TS7c-2-M06</b>   | -1436.131408 | -1436.088761 | -1436.087547 | -1436.216691 | -1437.975488 |

|                         |              |              |              |              |              |
|-------------------------|--------------|--------------|--------------|--------------|--------------|
| <b>TS7c-CMD</b>         | -1436.847537 | -1436.804289 | -1436.803076 | -1436.933167 | -1437.962984 |
| <b>TS7c-CMD-BP86</b>    | -1436.941241 | -1436.897028 | -1436.895814 | -1437.027863 | -1437.956459 |
| <b>TS7c-CMD-M06</b>     | -1436.121735 | -1436.078850 | -1436.077636 | -1436.205894 | -1437.965822 |
| <b>IN14c</b>            | -1207.843533 | -1207.807466 | -1207.806253 | -1207.924154 | -1208.96172  |
| <b>IN14c-2</b>          | -1436.885729 | -1436.842540 | -1436.841327 | -1436.973636 | -1437.997986 |
| <b>IN15c-2</b>          | -2080.590984 | -2080.538929 | -2080.537716 | -2080.689627 | -2081.730748 |
| <b>TS8c-2</b>           | -2080.588773 | -2080.537803 | -2080.536589 | -2080.685200 | -2081.722293 |
| <b>IN16c-2</b>          | -2080.578650 | -2080.526444 | -2080.525231 | -2080.678323 | -2081.717021 |
| <b>IN17c-2</b>          | -2080.596802 | -2080.543442 | -2080.542229 | -2080.700502 | -2081.727081 |
| <b>1d</b>               | -425.461830  | -425.445091  | -425.443878  | -425.513179  | -425.4969734 |
| <b>TS4d-CMD-R</b>       | -1536.039284 | -1535.988971 | -1535.987758 | -1536.134538 | -1537.186418 |
| <b>TS4d-CMD-S</b>       | -1536.040171 | -1535.989888 | -1535.988675 | -1536.135590 | -1537.187479 |
| <b>TS7d-CMD-RR</b>      | -1402.085330 | -1402.039961 | -1402.038748 | -1402.173978 | -1403.232521 |
| <b>TS7d-CMD-RS</b>      | -1402.081370 | -1402.036266 | -1402.035052 | -1402.169155 | -1403.228773 |
| <b>TS7d-CMD-SR</b>      | -1402.084618 | -1402.039377 | -1402.038164 | -1402.173051 | -1403.232013 |
| <b>TS7d-CMD-SS</b>      | -1402.081331 | -1402.036093 | -1402.034880 | -1402.169637 | -1403.22817  |
| <b>1e</b>               | -504.032494  | -504.011798  | -504.010585  | -504.087664  | -504.0772663 |
| <b>TS4e-CMD-R</b>       | -1614.609455 | -1614.555059 | -1614.553846 | -1614.709659 | -1615.765938 |
| <b>TS4e-CMD-S</b>       | -1614.613481 | -1614.559121 | -1614.557908 | -1614.713411 | -1615.76914  |
| <b>TS7e-CMD-SR</b>      | -1480.657303 | -1480.608056 | -1480.606843 | -1480.750626 | -1481.814007 |
| <b>TS7e-CMD-SR-BP86</b> | -1480.739709 | -1480.689349 | -1480.688135 | -1480.833755 | -1481.807807 |
| <b>TS7e-CMD-SR-M06</b>  | -1479.849544 | -1479.800490 | -1479.799276 | -1479.941387 | -1481.816879 |
| <b>TS7e-CMD-SS</b>      | -1480.650356 | -1480.600948 | -1480.599735 | -1480.744097 | -1481.807583 |
| <b>TS7e-CMD-SS-BP86</b> | -1480.734694 | -1480.683962 | -1480.682749 | -1480.830511 | -1481.800996 |
| <b>TS7e-CMD-SS-M06</b>  | -1479.842958 | -1479.793749 | -1479.792535 | -1479.934760 | -1481.810919 |

$E_0$  = Sum of electronic and zero-point energies calculated by B3LYP-D3

$E$  = Sum of electronic and thermal energies calculated by B3LYP-D3

$H_{383.15}$  = Sum of electronic and thermal enthalpies calculated by B3LYP-D3

$G_{383.15}$  = Sum of electronic and thermal free energies calculated by B3LYP-D3

$E_{(\text{sol}, \text{B3LYP})}$  = Single point energies calculated by B3LYP-D3 in solvent

## Section 8. Calculated Imaginary Frequencies of All Transition States

### Species

| Species             | Frequency |
|---------------------|-----------|
| <b>TS1a-meta</b>    | -1232.26  |
| <b>TS1a-oxd</b>     | -1058.33  |
| <b>TS2a-CMD</b>     | -61.91    |
| <b>TS2a-meta</b>    | -1167.24  |
| <b>TS2a-oxd</b>     | -915.99   |
| <b>TS2a-2-CMD</b>   | -1574.26  |
| <b>TS2a-2-meta</b>  | -1473.23  |
| <b>TS2a-2-oxd</b>   | -578.84   |
| <b>TS2a-2-CMD-a</b> | -1164.63  |
| <b>TS2a-2-CMD-b</b> | -1414.94  |
| <b>TS2a-anion</b>   | -1141.67  |
| <b>TS2a-1-oxd</b>   | -896.81   |
| <b>TS2a-3-CMD</b>   | -1536.03  |
| <b>TS2a-3-meta</b>  | -1553.17  |
| <b>TS2a-3-oxd</b>   | -673.34   |
| <b>TS2a-3-CMD-a</b> | -945.75   |
| <b>TS2a-3-CMD-b</b> | -1490.44  |
| <b>TS2a-3-CMD-c</b> | -1540.4   |
| <b>TS3a</b>         | -285.62   |
| <b>TS3a-HFIP</b>    | -10.25    |
| <b>TS3a-a</b>       | -296.5    |
| <b>TS3a-CMD</b>     | -1501.52  |
| <b>TS3a-CMD-a</b>   | -1329.01  |
| <b>TS3a-meta</b>    | -1478.84  |
| <b>TS3a-oxd</b>     | -267.25   |
| <b>TS3a-1-CMD</b>   | -1501.51  |
| <b>TS3a-1-CMD-a</b> | -1329.01  |
| <b>TS4a-CMD</b>     | -1433.13  |
| <b>TS4a-CMD-a</b>   | -1171.59  |
| <b>TS4a-CMD-b</b>   | -1577.90  |
| <b>TS4a-meta</b>    | -1543.48  |
| <b>TS4a-meta-a</b>  | -1408.34  |
| <b>TS4a-meta-b</b>  | -1428.53  |
| <b>TS4a-oxd</b>     | -348.11   |
| <b>TS4a-oxd-a</b>   | -509.30   |
| <b>TS4a-oxd-b</b>   | -537.96   |
| <b>TS5a</b>         | -281.93   |
| <b>TS5a-BP86</b>    | -261.52   |

|                      |          |
|----------------------|----------|
| <b>TS5a-M06</b>      | -250.47  |
| <b>TS5a-1</b>        | -306.60  |
| <b>TS5a-1-BP86</b>   | -286.01  |
| <b>TS5a-1-M06</b>    | -289.61  |
| <b>TS5a-a</b>        | -290.75  |
| <b>TS6a</b>          | -573.38  |
| <b>TS6a-BP86</b>     | -511.30  |
| <b>TS6a-M06</b>      | -426.50  |
| <b>TS6a-a</b>        | -819.61  |
| <b>TS6a-b</b>        | -594.37  |
| <b>TS6a-c</b>        | -279.47  |
| <b>TS6a-3</b>        | -192.32  |
| <b>TS6a-3-BP86</b>   | -184.90  |
| <b>TS6a-3-M06</b>    | -161.04  |
| <b>TS6a-3-a</b>      | -259.67  |
| <b>TS6a-4</b>        | -556.78  |
| <b>TS6a-4-a</b>      | -550.80  |
| <b>TS6a-CMD</b>      | -1778.92 |
| <b>TS7a-CMD</b>      | -1267.92 |
| <b>2-TS7a-CMD</b>    | -1054.71 |
| <b>TS7a-CMD-BP86</b> | -947.68  |
| <b>TS7a-CMD-M06</b>  | -1342.56 |
| <b>TS7a-CMD-a</b>    | -803.76  |
| <b>TS7a-CMD-b</b>    | -1434.15 |
| <b>TS7a-meta</b>     | -444.15  |
| <b>TS7a-oxd</b>      | -518.78  |
| <b>TS7a-1-CMD</b>    | -885.11  |
| <b>TS7a-1-CMD-a</b>  | -701.15  |
| <b>TS7a-1-meta</b>   | -948.14  |
| <b>TS7a-1-oxd</b>    | -943.66  |
| <b>TS7a-2</b>        | -297.06  |
| <b>TS7a-2-BP86</b>   | -249.69  |
| <b>TS7a-2-M06</b>    | -316.12  |
| <b>TS7a-4-CMD</b>    | -1420.06 |
| <b>2-TS7a</b>        | -828.16  |
| <b>2-TS7a-4</b>      | -480.05  |
| <b>TS8a</b>          | -233.62  |
| <b>TS8a-1</b>        | -632.15  |
| <b>TS8a-1-a</b>      | -632.15  |
| <b>TS8a-1-CMD</b>    | -197.99  |
| <b>TS9a-CMD</b>      | -1012.79 |
| <b>TS9a-meta</b>     | -627.42  |
| <b>TS9a-oxd</b>      | -948.58  |

|                         |          |
|-------------------------|----------|
| <b>TS10a</b>            | -579.11  |
| <b>TS11a</b>            | -75.35   |
| <b>TS6b</b>             | -584.77  |
| <b>TS6b-BP86</b>        | -524.11  |
| <b>TS6b-M06</b>         | -397.97  |
| <b>TS6b-a</b>           | -832.61  |
| <b>TS6b-3</b>           | -298.68  |
| <b>TS6b-3-BP86</b>      | -265.09  |
| <b>TS6b-3-M06</b>       | -325.43  |
| <b>TS6b-3-a</b>         | -330.47  |
| <b>TS6b-4</b>           | -551.58  |
| <b>TS6b-4-a</b>         | -496.51  |
| <b>TS7b-CMD</b>         | -1315.28 |
| <b>TS7b-3-CMD</b>       | -1406.25 |
| <b>TS7b-3-CMD-a</b>     | -1107.99 |
| <b>TS7b-4-CMD</b>       | -1433.86 |
| <b>TS8b-3</b>           | -303.58  |
| <b>2-TS7b-3-CMD</b>     | -1443.67 |
| <b>2-TS8b-3</b>         | -312.52  |
| <b>TS7c-2</b>           | -250.88  |
| <b>TS7c-2-BP86</b>      | -224.82  |
| <b>TS7c-2-M06</b>       | -227.06  |
| <b>TS7c-CMD</b>         | -1288.51 |
| <b>TS7c-CMD-BP86</b>    | -932.97  |
| <b>TS7c-CMD-M06</b>     | -1347.69 |
| <b>TS8c-2</b>           | -39.50   |
| <b>TS4d-CMD-R</b>       | -1431.78 |
| <b>TS4d-CMD-S</b>       | -1448.34 |
| <b>TS7d-CMD-RR</b>      | -1298.59 |
| <b>TS7d-CMD-RS</b>      | -1237.83 |
| <b>TS7d-CMD-SR</b>      | -1320.73 |
| <b>TS7d-CMD-SS</b>      | -1270.80 |
| <b>TS4e-CMD-R</b>       | -1437.08 |
| <b>TS4e-CMD-S</b>       | -1453.56 |
| <b>TS7e-CMD-SR</b>      | -1321.88 |
| <b>TS7e-CMD-SR-BP86</b> | -1022.90 |
| <b>TS7e-CMD-SR-M06</b>  | -1367.54 |
| <b>TS7e-CMD-SS</b>      | -1274.77 |
| <b>TS7e-CMD-SS-BP86</b> | -956.14  |
| <b>TS7e-CMD-SS-M06</b>  | -1350.88 |
